# Supplementary material for: Particle emissions from microalgae biodiesel combustion and their relative oxidative potential
Source: Royal Society of Chemistry journal article supplement (doi:10.1039/c5em00125k), 2015-01-01
Supplement: c5em00125k1.pdf [file c5em00125k1.pdf]

## Supporting Information (SI):

**Table SI-1: Fatty acid profile of biodiesels used [derived from reference]**

| FAME                  | Biodiesel feedstocks                     |                 |                   |
|-----------------------|------------------------------------------|-----------------|-------------------|
|                       | <i>Cryptocodinium cohnii</i> (Microalga) | Cotton seed oil | Waste cooking oil |
| C14:0                 | 8.30                                     | 0.544           | 0.00              |
| C16:0                 | 22.20                                    | 17.854          | 11.2              |
| C18:0                 | 0.56                                     | 2.532           | 3.50              |
| C18:1(Tran)           | 0.00                                     | 24.203          | 2.70              |
| C18:1 (cis)           | 0.00                                     | 1.268           | 64.4              |
| C18:2(cis-9,12)       | 0.00                                     | 50.246          | 18.3              |
| C18:3(all cis 6,9,12) | 0.41                                     | 1.537           | 0.00              |
| C20:3                 | 0.50                                     | 0.00            | 0.00              |
| C20:4                 | 0.70                                     | 0.00            | 0.00              |
| C20:5 (EPA)           | 1.70                                     | 0.00            | 0.00              |
| C22:5                 | 17.90                                    | 0.00            | 0.00              |
| C22:6 (DHA)           | 47.70                                    | 0.00            | 0.00              |
| SFAs                  | 31.06                                    | 21.805          | 14.72             |
| MUFA                  | 0.00                                     | 26.316          | 67.03             |
| PUFA                  | 68.94                                    | 51.879          | 18.25             |
| Average chain length  | 20.38                                    | 18.94           | 18.78             |
| Average unsaturation  | 3.46                                     | 1.47            | 1.03              |

**Table SI-2: Properties of biodiesels and reference diesel used [derived from reference]**

| Fuel property                                   | Test method | Microalgal biodiesel | Cotton seed oil biodiesel | Waste cooking oil biodiesel | Biodiesel Standard ASTM 6751-12 | Biodiesel Standard EN 14214 | Petro-Diesel |
|-------------------------------------------------|-------------|----------------------|---------------------------|-----------------------------|---------------------------------|-----------------------------|--------------|
| CN                                              | DIN 51773   | 46.5                 | 87                        | 58.6                        | 47 min                          | 51                          | 53.3         |
| Kinematic viscosity @40°C ( mm <sup>2</sup> /s) | ASTM D445   | 5.06                 | 4.17                      | 4.82                        | 1.9-6.0                         | 3.5-5.0                     | 2.64         |
| Density @15°C ( kg/L)                           | ASTM D4052  | 0.912                | 0.88                      | 0.87                        | 0.86-0.90                       | 0.86-0.90                   | 0.84         |
| HHV ( MJ/kg)                                    | -           | 39.86                | 39.73                     | 39.9                        | -                               | -                           | -            |
| LHV ( MJ/kg)                                    | -           | 37.42                |                           | 37.2                        | -                               |                             | 44.0         |
| Acid value ( mg KOH/g)                          | ASTM D974   | 0.14                 |                           | -                           | 0.5 max                         | 0.5max                      | 0.0          |
| Flash point (close cup) °C                      | ASTM D93    | 95.0                 |                           | -                           | 93 min                          | -                           | 71.0         |
| Flash point (°C)                                | ASTM D93    | -                    |                           | ≥180                        | 130                             | 120                         | -            |
| Sulfur content ( mg/kg)                         | ASTM D7039  | 7.5                  |                           | -                           | 15max                           | 10max                       | 5.9          |
| cloud point (°C)                                | IP 309      | 16.1                 |                           | -                           | report                          | report                      | 4.0          |
| Lubricity @°60 (mm)                             | IP 405      | 0.136                |                           | -                           | -                               | -                           | 0.406        |
| copper corrosion (3 hrs @50°C)                  | ASTM D130   | 1a                   |                           | -                           | 1max                            | 1 max                       | 1a           |
| water sediment ( vol%)                          | ASTM D2709  | 0                    |                           | -                           | 0.005% max                      | 0.005% max                  | 0.0          |
| FBP (°C)                                        | ASTM D86    | -                    |                           | -                           | -                               | -                           | 357.7        |
| Oxygen content ( vol%)                          | -           | 10.47                | 10.91                     | 10.93                       | -                               | -                           | -            |
| Hydrogen content ( vol%)                        | -           | 11.12                | 11.94                     | 12.21                       | -                               | -                           | -            |
| Carbon content ( vol%)                          | -           | 78.41                | 77.15                     | 76.93                       | -                               | -                           | -            |

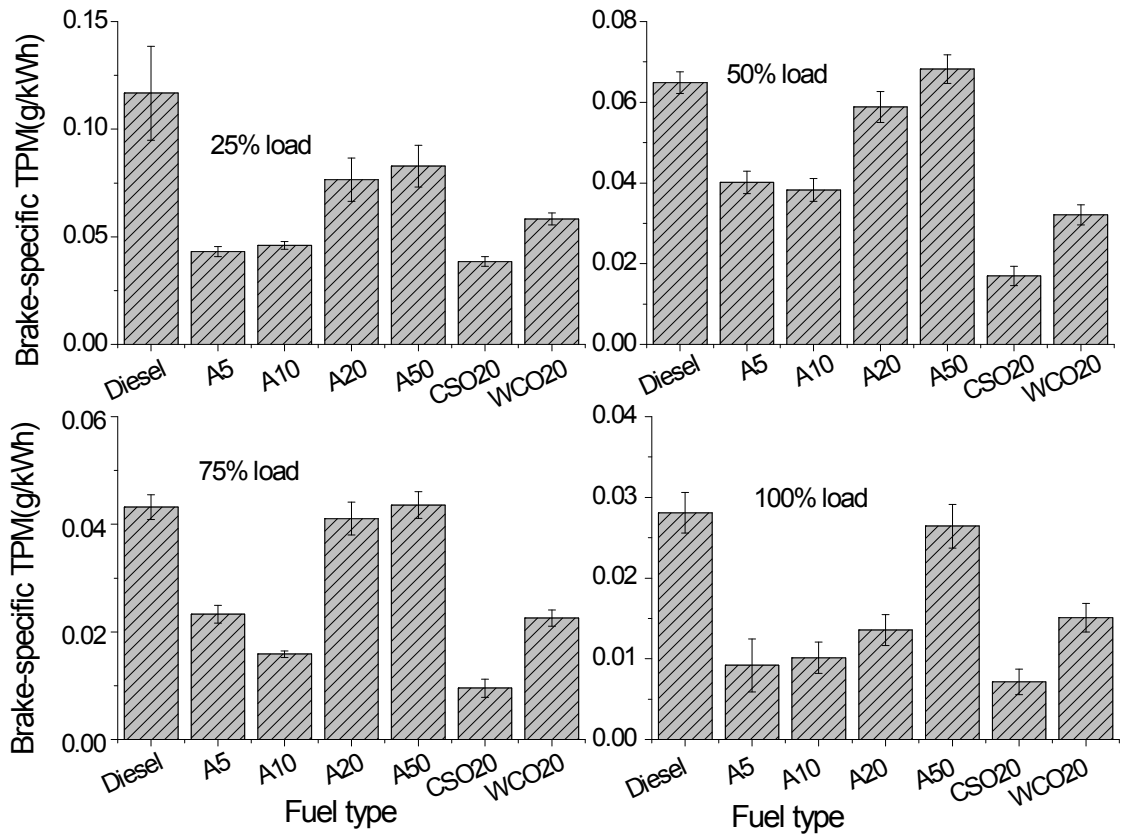

Figure SI-1: Brake-specific TPM emissions of diesel and biodiesel blends

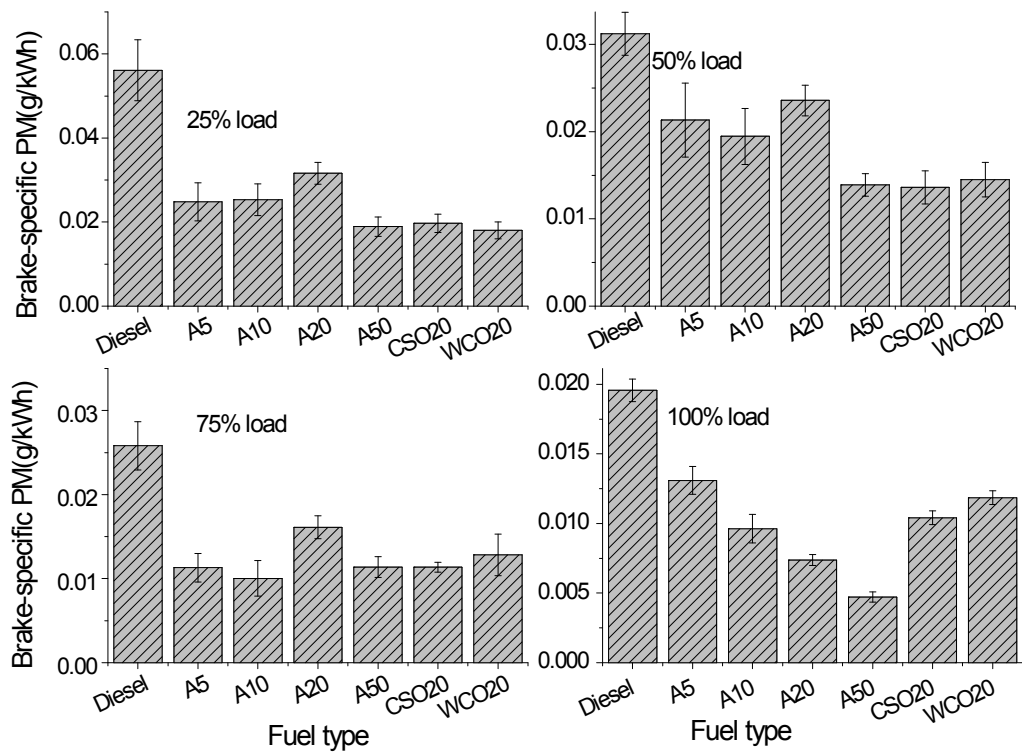

**Figure SI-2:** Brake specific TPM emissions measured by DustTrak of the diesel and biodiesel blends

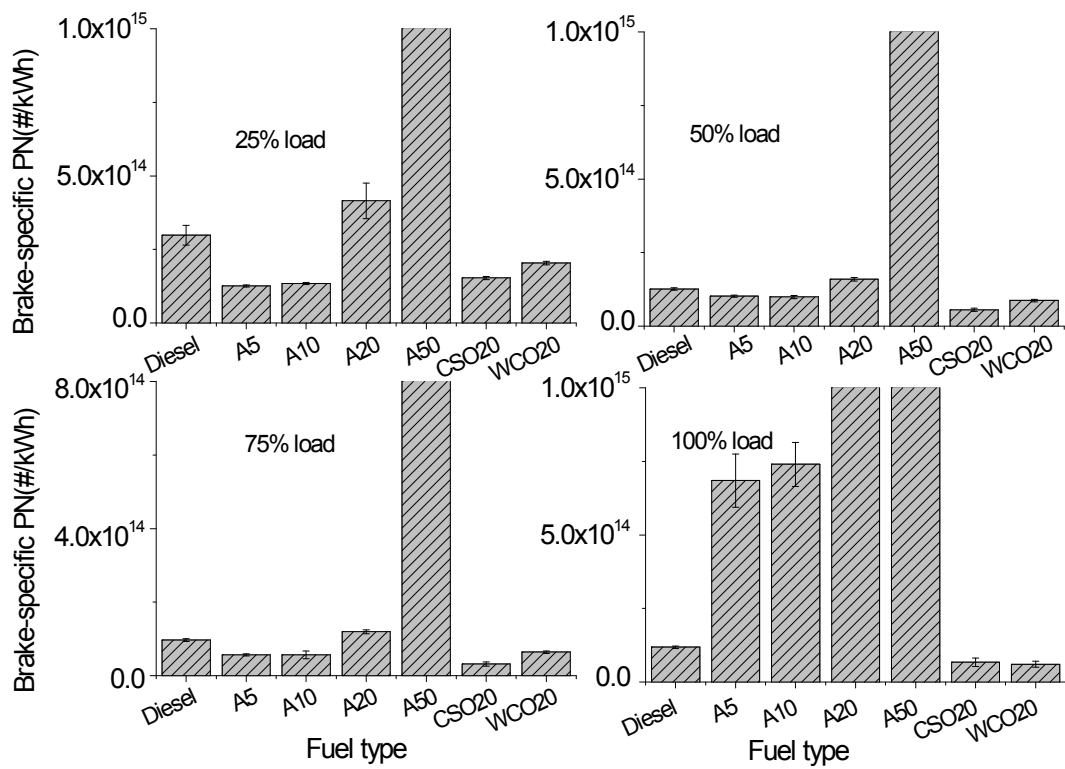

Figure SI-3: Brake specific total PN emissions of the diesel and biodiesel blends
